# Supplementary material for: The complete chemical structure of Saccharomyces cerevisiae rRNA: partial pseudouridylation of U2345 in 25S rRNA by snoRNA snR9
Source: PubMed Central journal article supplement — Nucleic Acids Res. 2016 Jun 20;44(18):8951–61. doi: 10.1093/nar/gkw564 (PMC5062969; doi:10.1093/nar/gkw564), 2016-06-20
Supplement: supp_gkw564_nar-01140-r-2016-File004.pdf [file supp_gkw564_nar-01140-r-2016-File004.pdf]

**The complete chemical structure of *Saccharomyces cerevisiae* rRNA:  
Partial pseudouridylation of U2345 in 25S rRNA by snoRNA snR9**

Masato Taoka<sup>\*1,2</sup>, Yuko Nobe<sup>1,2</sup>, Yuka Yamaki<sup>1,2</sup>, Yoshio Yamauchi<sup>1,2</sup>, Hideaki Ishikawa<sup>2,3</sup>, Nobuhiro Takahashi<sup>2,3</sup>, Hiroshi Nakayama<sup>2,4</sup>, Toshiaki Isobe<sup>\*1,2</sup>

<sup>1</sup>Department of Chemistry, Graduate School of Science and Engineering, Tokyo Metropolitan University, Minami-osawa 1-1, Hachioji-shi, Tokyo 192-0397, Japan

<sup>2</sup>Core Research for Evolutional Science and Technology, Japan Science and Technology Agency, Sanbancho 5, Chiyoda-ku, Tokyo 102-0075, Japan

<sup>3</sup>Department of Biotechnology, United Graduate School of Agriculture, Tokyo University of Agriculture and Technology, Saiwai-cho 3-5-8, Fuchu-shi, Tokyo 183-8509, Japan

<sup>4</sup>Biomolecular Characterization Unit, RIKEN Center for Sustainable Resource Science, 2-1 Hirosawa, Wako, Saitama 351-0198, Japan

\*Corresponding authors:

Masato Taoka, Ph.D., Laboratory of Biochemistry, Department of Chemistry, Graduate School of Science and Engineering, Tokyo Metropolitan University, Minami-osawa 1-1, Hachioji-shi, Tokyo 192-0397, Japan

Tel: +81 426 77 2543; Fax: +81 426 77 2525

Email: mango@tmu.ac.jp

Toshiaki Isobe, Ph.D., Laboratory of Biochemistry, Department of Chemistry, Graduate School of Science and Engineering, Tokyo Metropolitan University, Minami-osawa 1-1, Hachioji-shi, Tokyo 192-0397, Japan

Tel: +81 426 77 5667; Fax: +81 426 77 2525

Email: isobe-toshiaki@tmu.ac.jp

Supplementary Table 1-1. Oligonucleotides used in this study.

| Oligonucleotide   | Sequence                                                                         | DNA/RNA | Note                                                                                                                                                   |
|-------------------|----------------------------------------------------------------------------------|---------|--------------------------------------------------------------------------------------------------------------------------------------------------------|
| c5S-69-chimera    | AmCmUmCmGmUmCmAm(GGCT)CmUmUmAmCmCmAmGmCmUmUm                                     | RNA/DNA | Used for RNase H digestion to produce Fragment H1 or H2. Nm refers to 2'-O-methyl ribonucleotide. Deoxyribonucleotides are indicated in parentheses.   |
| c18S-385-chimera  | GmGmCmUmCmCmUmCm(TCCG)GmAmAmUmCmGmAmAmCmCmCm                                     | RNA/DNA | Used for RNase H digestion to produce Fragment H3 or H4. Nm refers to 2'-O-methyl ribonucleotide. Deoxyribonucleotides are indicated in parentheses.   |
| c18S-580-chimera  | AmGmCmUmGmGmAmAm(TTAC)CmGmCmGmCmUmGmCmUmGmGm                                     | RNA/DNA | Used for RNase H digestion to produce Fragment H4 or H5. Nm refers to 2'-O-methyl ribonucleotide. Deoxyribonucleotides are indicated in parentheses.   |
| c18S-734-chimera  | AmGmUmCmUmUmGmGm(TTCG)CmCmAmAmGmAmGmCmCmAmCmAm                                   | RNA/DNA | Used for RNase H digestion to produce Fragment H5 or H6. Nm, 2'-O-methyl ribonucleotide. Deoxyribonucleotides are indicated in parentheses.            |
| c18S-1077-chimera | CmUmCmGmUmAmAmGm(GTGC)CmGmAmGmUmGmGmUmCmAmUm                                     | RNA/DNA | Used for RNase H digestion to produce Fragment H6 or H7. Nm, 2'-O-methyl ribonucleotide. Deoxyribonucleotides are indicated in parentheses.            |
| c18S-1321-chimera | AmGmGmUmCmUmCmGmUmUmCmGmUm(TATC)GmCmAmUmUmAmAmGmCmAm                             | RNA/DNA | Used for RNase H digestion to produce Fragment H7 or H8. Nm, 2'-O-methyl ribonucleotide. Deoxyribonucleotides are indicated in parentheses.            |
| c25S-461-chimera  | AmCmCmCmAmCmAmAmGm(GMCA)GmAmGmGmCmAmCmAmAm                                       | RNA/DNA | Used for RNase H digestion to produce Fragment H9 or H10. Nm, 2'-O-methyl ribonucleotide. Deoxyribonucleotides are indicated in parentheses.           |
| c25S-747-chimera  | UmCmAmGmGmAmUmCmGmUmCmGmAm(TTGT)GmCmAmCmCmUm                                     | RNA/DNA | Used for RNase H digestion to produce Fragment H10 or H11. Nm, 2'-O-methyl ribonucleotide. Deoxyribonucleotides are indicated in parentheses.          |
| c25S-1015-chimera | UmCmGmAmCmCmCmGm(GAAC)UmCmUmAmUmCmAmUmUmCmGm                                     | RNA/DNA | Nm, 2'-O-methyl ribonucleotide. Nm refers to 2'-O-methyl ribonucleotide. Deoxyribonucleotides are indicated in parentheses.                            |
| c25S-1425-chimera | UmGmCmAmCmUmAmGm(AGGC)CmGmUmUmCmGmAmCmCmGmAm                                     | RNA/DNA | Used for RNase H digestion to produce Fragment H12 or H13. Nm, 2'-O-methyl ribonucleotide. Deoxyribonucleotides are indicated in parentheses.          |
| c25S-1855-chimera | UmUmCmAmCmUmUmGmGm(AGAC)CmUmGmCmUmGmCmGmUm                                       | RNA/DNA | Used for RNase H digestion to produce Fragment H13, H14 or H16. Nm, 2'-O-methyl ribonucleotide. Deoxyribonucleotides are indicated in parentheses.     |
| c25S-2029-chimera | GmGmCmAmCmGmCmAmAmGm(TAGT)CmCmGmCmUmAmGmCmAm                                     | RNA/DNA | Used for RNase H digestion to produce Fragment H14 or H15. Nm refers to 2'-O-methyl ribonucleotide. Deoxyribonucleotides are indicated in parentheses. |
| c25S-2286-chimera | GmAmUmGmAmCmGm(AGGC)AmUmUmUmGmCmUmAmCmUmUmAm                                     | RNA/DNA | Used for RNase H digestion to produce Fragment H15, H16 or H17. Nm, 2'-O-methyl ribonucleotide. Deoxyribonucleotides are indicated in parentheses.     |
| c25S-2581-chimera | UmCmAmAmCmCmGmGm(ATCA)GmCmCmCmGmAmAmUmGmGm                                       | RNA/DNA | Used for RNase H digestion to produce Fragment H17 or H18. Nm, 2'-O-methyl ribonucleotide. Deoxyribonucleotides are indicated in parentheses.          |
| c25S-2891-chimera | UmUmCmGmUmUm(ATGA)UmAmGmGmAmAmGmCmCm                                             | RNA/DNA | Used for RNase H digestion to produce Fragment H18 or H19. Nm, 2'-O-methyl ribonucleotide. Deoxyribonucleotides are indicated in parentheses.          |
| c25S-2963-chimera | CmCmUmGmUmCmUmCmAmCm(GACG)GmUmCmUmAmAmCmCmCmAm                                   | RNA/DNA | Used for RNase H digestion to produce Fragment H20. Nm refers to 2'-O-methyl ribonucleotide. Deoxyribonucleotides are indicated in parentheses.        |
| snR9_F_KO         | ATCTTAAGTTTCTCCATTTCTCCTTCTCTTTCTTTCTTTCTTCTAAACCCTCGTTGTAACGACGGCCAC            | DNA     | Used for PCR-amplification of the cDNA carrying a snoRNA disrupted by <i>his3</i> .                                                                    |
| snR9_R_KO         | CAAGAGTTAAGAAAGCTTAAAAACGCTATGTAACCTGGCATGCAGTCTAAATATTTGCAAAACACAGGAAACAGCTATG  | DNA     | Used for PCR-amplification of the cDNA carrying a snoRNA disrupted by <i>his3</i> .                                                                    |
| snR33_F_KO        | TTCGTTATGAAAATTTTCTACTCTCTTTCACATTTTTTTTTTCATAAGAAATTAATAAATGTTGTAACGACGGCCAG    | DNA     | Used for PCR-amplification of the cDNA carrying a snoRNA disrupted by <i>his3</i> .                                                                    |
| snR33_R_KO        | AAAAAGTATACAGATAAACAAAGCTCAGTAGTAATACATAAAAATAAAAAGTTTTGCAAAATCCACAGGAAACAGCTATG | DNA     | Used for PCR-amplification of the cDNA carrying a snoRNA disrupted by <i>his3</i> .                                                                    |
| snR65_F_KO        | TTTCCACGTATTTTAAAAAGGGTAGCCTGCTTACCAGATGTTCTTGTCAACAAAATTCGTTGTAACGACGGCC        | DNA     | Used for PCR-amplification of the cDNA carrying a snoRNA disrupted by <i>his3</i> .                                                                    |
| snR65_R_KO        | CGATTTGATTAAACGTCATTAACGAAATGTAAGGACACAATTACCAAGAGTTACAAAATTCGCACAGGAAACAGCTATC  | DNA     | Used for PCR-amplification of the cDNA carrying a snoRNA disrupted by <i>his3</i> .                                                                    |
| snR9_F_Ex         | GCGTCGACGGGAATAATACTAACTCTGTTATATAGAATTTCTACGCCCTTTTCTCTATGGCTAT                 | DNA     | Used for PCR-amplification of the snR9 cDNA.                                                                                                           |
| snR9_R1_Ex        | CCATATTTCAGTAATTGGTCTATTTGTCTCCGTTGTCCACGCTTTCATAGCCATAGAGGAAAAGGC               | DNA     | Used for PCR-amplification of the snR9 cDNA.                                                                                                           |
| snR9_R2_Ex        | GTCAGGATATCAGCTTAATCCTCACCCATGAAGAAGAAGATATGCAAAAGCCATATTCAGTAATTGGTCT           | DNA     | Used for PCR-amplification of the snR9 cDNA.                                                                                                           |
| snR9_R3_Ex        | GTCTGCAGAGTATGCTGAAGGACTAATGATAGTGGGTGAGGATATCAGCTTAATC                          | DNA     | Used for PCR-amplification of the snR9 cDNA.                                                                                                           |
| snR9_A33G_F_Ex    | GCGTCGACGGGAATAATACTAACTCTGTTATATAGAATTTCTACGCCCTTTTCTCTATGGCTAT                 | DNA     | Used for PCR-amplification of the snR9_A33G cDNA.                                                                                                      |
| snR9_G67A_R1_Ex   | CCATATTTCAGTAATTGGTCTATTTGTCTCCGTTGTCCACGCTTTCATAGCCATAGAGGAAAAGGC               | DNA     | Used for PCR-amplification of the snR9_G67A cDNA.                                                                                                      |
| snR9_G69A_R1_Ex   | CCATATTTCAGTAATTGGTCTATTTGTCTCCGTTGTCCACGCTTTCATAGCCATAGAGGAAAAGGC               | DNA     | Used for PCR-amplification of the snR9_G69A cDNA.                                                                                                      |

Supplementary Table 1-2. Composition of culture media used in this study.

| Amino acid/<br>Nucleobase/<br>Other        | U/C-5-D<br>labelling<br>medium<br>(mg/L) | Sythetic<br>medium<br>(mg/L) | YPD<br>(mg/L) |
|--------------------------------------------|------------------------------------------|------------------------------|---------------|
| Adenine                                    | -                                        | 35                           | -             |
| Uracil                                     | -                                        | 17                           | -             |
| 5-D-Uracil                                 | 100                                      | -                            | -             |
| Arginine                                   | -                                        | 17                           | -             |
| Aspartate                                  | -                                        | 84                           | -             |
| Glutamate                                  | -                                        | 84                           | -             |
| Histidine                                  | -                                        | 17                           | -             |
| Leucine                                    | -                                        | 50                           | -             |
| Lysine                                     | -                                        | 25                           | -             |
| Methionine                                 | -                                        | 17                           | -             |
| Phenylalanine                              | -                                        | 42                           | -             |
| Serine                                     | -                                        | 315                          | -             |
| Threonine                                  | -                                        | 168                          | -             |
| Tryptophan                                 | -                                        | 34                           | -             |
| Tyrosine                                   | -                                        | 25                           | -             |
| Valine                                     | -                                        | 126                          | -             |
| Alanine                                    | -                                        | 35                           | -             |
| Asparagine                                 | -                                        | 35                           | -             |
| Cysteine                                   | -                                        | 35                           | -             |
| Glutamine                                  | -                                        | 35                           | -             |
| Glycine                                    | -                                        | 35                           | -             |
| Isoleucine                                 | -                                        | 35                           | -             |
| Proline                                    | -                                        | 35                           | -             |
| Yeast extract                              | -                                        | -                            | 10 (g)        |
| Peptone                                    | -                                        | -                            | 20 (g)        |
| Yeast nitrogen base<br>without amino acids | 6.8 (g)                                  | 6.7 (g)                      | -             |
| Glucose                                    | 10 (g)                                   | 20 (g)                       | 20 (g)        |

Supplementary Table 1-3. *S. cerevisiae* strains used in this study.

| Strain Name     | Mating type | Genotype                                                                                                                                     |
|-----------------|-------------|----------------------------------------------------------------------------------------------------------------------------------------------|
| BY5208          | $\alpha$    | <i>ura3-52 his3-<math>\Delta</math>200</i>                                                                                                   |
| $\Delta$ snR9   | $\alpha$    | <i>ura3-52 his3-<math>\Delta</math>200 snR9::CgHIS3</i>                                                                                      |
| $\Delta$ snR33  | $\alpha$    | <i>ura3-52 his3-<math>\Delta</math>200 snR33::CgHIS3</i>                                                                                     |
| $\Delta$ snR65  | $\alpha$    | <i>ura3-52 his3-<math>\Delta</math>200 snR65::CgHIS3</i>                                                                                     |
| $\Delta$ snR9_2 | a           | <i>ura3-52 his3-<math>\Delta</math>200 leu2-<math>\Delta</math>1 lys2-<math>\Delta</math>202<br/>trp1-<math>\Delta</math>63 snR9::CgHIS3</i> |

Supplementary Table S2. Position, type, and stoichiometry of modified nucleotides of *S. cerevisiae* rRNAs determined by the SILNAS-MS methodology.

| RNA  | Position of modified nucleotide | Modification                                      | RNase T1 fragment                          |                                    |                                                                                                          | RNase A fragment                 |                                    |                                                                                                                                                                                                                               | Stoichiometry (%) of the modified nucleotide during <i>S. cerevisiae</i> logarithmic growth at 30 °C | Labeling and digestion methods <sup>d</sup> | Location in the ribosome (interior, 1; exterior, 0) | Position of corresponding nucleotide in <i>S. pombe</i> rRNA <sup>e</sup> | PTM for corresponding nucleotide in <i>S. pombe</i> rRNA <sup>e</sup> | Stoichiometry (%) of PTM of corresponding residue in <i>S. pombe</i> rRNA at 30 °C <sup>e</sup> | Responsible snoRNA or enzyme <sup>f</sup> |
|------|---------------------------------|---------------------------------------------------|--------------------------------------------|------------------------------------|----------------------------------------------------------------------------------------------------------|----------------------------------|------------------------------------|-------------------------------------------------------------------------------------------------------------------------------------------------------------------------------------------------------------------------------|------------------------------------------------------------------------------------------------------|---------------------------------------------|-----------------------------------------------------|---------------------------------------------------------------------------|-----------------------------------------------------------------------|-------------------------------------------------------------------------------------------------|-------------------------------------------|
|      |                                 |                                                   | Fragment sequence <sup>a</sup>             | Identification method <sup>b</sup> | Position(s) of candidate fragment(s) <sup>f</sup>                                                        | Identified fragment <sup>c</sup> | Identification method <sup>b</sup> | Position(s) of candidate fragment(s) <sup>f</sup>                                                                                                                                                                             |                                                                                                      |                                             |                                                     |                                                                           |                                                                       |                                                                                                 |                                           |
| 5S   | 1                               | 5'-end triphosphate                               | pppGp                                      | ND                                 | NA                                                                                                       | pppGGUp                          | M                                  | 1-3                                                                                                                                                                                                                           | ND                                                                                                   | U/C, RNase A                                | ND                                                  | 1                                                                         | pppG                                                                  | ND                                                                                              | NA                                        |
| 5S   | 90                              | pseudouridine                                     | ψAGp                                       | M, 50U                             | 50-62, 78-80, 83-85                                                                                      | Gψp                              | M                                  | NA                                                                                                                                                                                                                            | 100                                                                                                  | G, RNase T1                                 | 0                                                   | 49                                                                        | no PTM                                                                | 0                                                                                               | PUS7                                      |
| 5S   | 121                             | 3'-end OH                                         | CAAUCU-OH                                  | M                                  | 118-121                                                                                                  | U-OH                             | ND                                 | NA                                                                                                                                                                                                                            | ND                                                                                                   | G, RNase T1                                 | ND                                                  | 119                                                                       | 3'-end OH                                                             | ND                                                                                              | NA                                        |
| 5.8S | 1                               | 5'-end phosphate                                  | pAAACUUCACCAACp                            | M                                  | 1-16                                                                                                     | pAAAcP                           | M                                  | 1-4                                                                                                                                                                                                                           | ND                                                                                                   | G, RNase T1                                 | ND                                                  | 4                                                                         | 5'-end phosphate                                                      | ND                                                                                              | NA                                        |
| 5.8S | 73                              | pseudouridine                                     | AAψUp                                      | A, M, 50U                          | 71-75                                                                                                    | GAAψp                            | M                                  | 70-73, 87-90, 95-98                                                                                                                                                                                                           | 78                                                                                                   | G, RNase T1                                 | 0                                                   | 76                                                                        | ψ                                                                     | 76                                                                                              | sirR43                                    |
| 5.8S | 158                             | 3'-end OH                                         | UCAUJU-OH                                  | M                                  | 153-158                                                                                                  | U-OH                             | ND                                 | NA                                                                                                                                                                                                                            | ND                                                                                                   | G, RNase T1                                 | ND                                                  | 160                                                                       | 3'-end OH                                                             | ND                                                                                              | NA                                        |
| 18S  | 1                               | 5'-end phosphate                                  | pUAUCUGp                                   | M                                  | 1-8                                                                                                      | pUp                              | ND                                 | NA                                                                                                                                                                                                                            | ND                                                                                                   | G, RNase T1                                 | ND                                                  | 1                                                                         | 5'-end phosphate                                                      | ND                                                                                              | NA                                        |
| 18S  | 28                              | 2'-O-methyl A                                     | UCAUAmUGp                                  | A, M                               | 24-30                                                                                                    | AmUp                             | M                                  | NA                                                                                                                                                                                                                            | >95                                                                                                  | G, RNase T1                                 | 1                                                   | 28                                                                        | Am                                                                    | 100                                                                                             | sirR74                                    |
| 18S  | 100                             | 2'-O-methyl A                                     | CUCAmUUAAPCAGp                             | A, M, 50U                          | 97-109                                                                                                   | AmUp                             | M                                  | NA                                                                                                                                                                                                                            | 80                                                                                                   | N, RNase T1                                 | 1                                                   | 101                                                                       | Am                                                                    | 94                                                                                              | sirR51                                    |
| 18S  | 106                             | pseudouridine                                     | CUCAmUUAAPCAGp                             | A, M, 50U                          | 97-109                                                                                                   | AAAPp                            | M, 50U                             | 103-106, 299-302, 436-439, 473-476, 525-528, 1344-1347                                                                                                                                                                        | >95                                                                                                  | N, RNase T1                                 | 1                                                   | 107                                                                       | ψ                                                                     | 99                                                                                              | sirR44                                    |
| 18S  | 120                             | pseudouridine                                     | UUUψUUGp                                   | A, M, 50U                          | 116-123                                                                                                  | Aψp                              | M, 50U                             | NA                                                                                                                                                                                                                            | >95                                                                                                  | G, RNase T1                                 | 1                                                   | 121                                                                       | ψ                                                                     | 91                                                                                              | sirR49                                    |
| 18S  | 211                             | pseudouridine                                     | UAUUUψUAGp                                 | A, M, 50U                          | 205-214                                                                                                  | Aψp                              | M, 50U                             | NA                                                                                                                                                                                                                            | 83                                                                                                   | G, RNase T1                                 | 0                                                   | 212                                                                       | no PTM                                                                | 0                                                                                               | sirR49                                    |
| 18S  | 302                             | pseudouridine                                     | UUCAUCAAψUUCUGp                            | A, M, 50U                          | 292-307                                                                                                  | AAAPp                            | M, 50U                             | 103-106, 299-302, 436-439, 473-476, 525-528, 1344-1347                                                                                                                                                                        | 86                                                                                                   | G, RNase T1                                 | 1                                                   | 305                                                                       | ψ                                                                     | 42                                                                                              | sirR49                                    |
| 18S  | 414                             | 2'-O-methyl C                                     | CUACCACAUmCAAGp                            | A, M                               | 405-418                                                                                                  | CmCp                             | M                                  | NA                                                                                                                                                                                                                            | >95                                                                                                  | G, RNase T1                                 | 0                                                   | 417                                                                       | Cm                                                                    | 99                                                                                              | U14                                       |
| 18S  | 420                             | 2'-O-methyl A                                     | AmAGp                                      | M                                  | 197-199, 420-422, 923-925, 992-994, 1151-1153, 1410-1412, 1693-1695, 1759-1762                           | AAGAmAGGp                        | M                                  | 416-424                                                                                                                                                                                                                       | >95                                                                                                  | U/C, RNase A                                | 0                                                   | 423                                                                       | Am                                                                    | 98                                                                                              | sirR52                                    |
| 18S  | 436                             | 2'-O-methyl A                                     | CAmAAUUCACCAUCCUAAUUCAGp                   | M                                  | 435-457                                                                                                  | AmAAUp                           | M                                  | 103-106, 299-302, 436-439, 473-476, 525-528, 1344-1347                                                                                                                                                                        | 73                                                                                                   | G, RNase T1                                 | 1                                                   | 439                                                                       | Am                                                                    | 89                                                                                              | sirR87                                    |
| 18S  | 466                             | pseudouridine                                     | ψGp                                        | M, 50U                             | NA                                                                                                       | AGψp                             | M, 50U                             | 19-21, 22-24, 80-82, 108-110, 126-128, 333-335, 464-466, 615-617, 630-632, 664-666, 1013-1015, 1287-1289, 1348-1350, 1583-1585, 1648-1650, 1667-1669                                                                          | 60                                                                                                   | U/C, RNase H (Fragment H4)/RNase A          | 1                                                   | 469                                                                       | ψ                                                                     | 80                                                                                              | sirR189                                   |
| 18S  | 541                             | 2'-O-methyl A                                     | AmACAUAUp                                  | A, M                               | 541-548                                                                                                  | GAGGAmAcP                        | M                                  | 537-543                                                                                                                                                                                                                       | >95                                                                                                  | G, RNase T1                                 | 0                                                   | 544                                                                       | Am                                                                    | 100                                                                                             | sirR41                                    |
| 18S  | 562                             | 2'-O-methyl G                                     | GmUGp                                      | M                                  | 562-564, 902-904, 1048-1050, 1051-1053, 1295-1307, 1698-1270, 1271-1273, 1292-1294, 1352-1354, 1778-1780 | GmUp                             | M                                  | 6-8, 142-144, 153-155, 290-292, 325-327, 348-349, 561-663, 676-678, 647-649, 655-657, 823-825, 837-839, 871-873, 1050-1052, 1118-1120, 1267-1269, 1670-1272, 1291-1293, 1351-1353, 1367-1369, 1394-1396, 1512-1514, 1736-1738 | 67                                                                                                   | U/C, RNase H (Fragment H4)/RNase A          | 1                                                   | 565                                                                       | Gm                                                                    | 81                                                                                              | sirR40                                    |
| 18S  | 578                             | 2'-O-methyl U                                     | UmAAUCCAG                                  | M                                  | 578-586                                                                                                  | GGUmAAUp                         | M                                  | 153-158, 576-581, 1512-1517                                                                                                                                                                                                   | >95                                                                                                  | G, RNase T1                                 | 1                                                   | 581                                                                       | Um                                                                    | 100                                                                                             | sirR77                                    |
| 18S  | 619                             | 2'-O-methyl A                                     | UUAmAAAAp                                  | A, M                               | 617-624                                                                                                  | AmAAAAcP                         | M                                  | 619-625                                                                                                                                                                                                                       | 100                                                                                                  | G, RNase T1                                 | 1                                                   | 622                                                                       | no PTM                                                                | 0                                                                                               | sirR47                                    |
| 18S  | 632                             | pseudouridine                                     | ψUGp                                       | M, 50U                             | 8-10, 808-610, 611-613, 632-634, 649-651, 835-837, 1289-1291, 1608-1610                                  | AGψp                             | M, 50U                             | 19-21, 22-24, 80-82, 108-110, 126-128, 333-335, 464-466, 615-617, 630-632, 664-666, 1013-1015, 1287-1289, 1348-1350, 1583-1585, 1648-1650, 1667-1669                                                                          | 84                                                                                                   | U/C, RNase H (Fragment H5)/RNase A          | 0                                                   | 635                                                                       | ψ                                                                     | 105                                                                                             | sirR161                                   |
| 18S  | 759                             | pseudouridine                                     | AAAAAUψAGp                                 | A, M, 50U                          | 752-761                                                                                                  | ψp                               | ND                                 | NA                                                                                                                                                                                                                            | >95                                                                                                  | G, RNase T1                                 | 0                                                   | 772                                                                       | ψ                                                                     | 99                                                                                              | sirR80                                    |
| 18S  | 766                             | pseudouridine                                     | ψUCAAGp                                    | A, M, 50U                          | 766-772                                                                                                  | Gψp                              | M, 50U                             | NA                                                                                                                                                                                                                            | >95                                                                                                  | G, RNase T1                                 | 0                                                   | 779                                                                       | ψ                                                                     | 99                                                                                              | sirR161                                   |
| 18S  | 796                             | 2'-O-methyl A                                     | AAUAUAUmGp                                 | A, M                               | 788-797                                                                                                  | AmGCP                            | M                                  | 425-427, 567-569, 570-572, 585-587, 594-596, 796-798, 1357-1359, 1483-1485, 1600-1602                                                                                                                                         | >95                                                                                                  | G, RNase T1                                 | 0                                                   | 811                                                                       | Am                                                                    | 98                                                                                              | sirR53                                    |
| 18S  | 974                             | 2'-O-methyl A                                     | AmACp                                      | M                                  | 973-976, 1325-1328                                                                                       | AAGAmCp                          | M                                  | 970-975                                                                                                                                                                                                                       | 94                                                                                                   | U/C, RNase A                                | 1                                                   | 989                                                                       | Am                                                                    | 97                                                                                              | sirR54                                    |
| 18S  | 999                             | pseudouridine                                     | AψCAGp                                     | A, M, 50U                          | 996-1002                                                                                                 | GAψp                             | M, 50U                             | 10-12, 123-125, 243-245, 246-248, 287-289, 322-324, 377-379, 400-482, 660-662, 858-860, 997-999, 1255-1257, 1299-1301, 1318-1320, 1405-1407, 1435-1437, 1610-1612, 1654-1656                                                  | 84                                                                                                   | G, RNase T1                                 | 1                                                   | 1014                                                                      | ψ                                                                     | 105                                                                                             | sirR31                                    |
| 18S  | 1007                            | 2'-O-methyl C                                     | AUACmGp                                    | A, M                               | 1003-1008                                                                                                | CmGUp                            | M                                  | 114-116, 627-629, 668-670, 852-854, 1007-1009, 1010-1012, 1280-1282, 1530-1532, 1533-1535, 1641-1643, 1759-1761, 1773-1775                                                                                                    | >95                                                                                                  | G, RNase T1                                 | 1                                                   | 1022                                                                      | Cm                                                                    | 99                                                                                              | sirR79                                    |
| 18S  | 1126                            | 2'-O-methyl G                                     | CAAGmGp                                    | A, M                               | 554-557, 1123-1126, 1591-1594                                                                            | AAGmGCP                          | M                                  | 1124-1128                                                                                                                                                                                                                     | 89                                                                                                   | U/C, RNase A                                | 1                                                   | 1142                                                                      | Gm                                                                    | 108                                                                                             | sirR41                                    |
| 18S  | 1181                            | pseudouridine                                     | CψUAUUψGp                                  | M, 50U                             | 1180-1188                                                                                                | ψp                               | ND                                 | NA                                                                                                                                                                                                                            | >95                                                                                                  | N, RNase T1                                 | 1                                                   | 1198                                                                      | ψ                                                                     | 99                                                                                              | sirR85                                    |
| 18S  | 1187                            | pseudouridine                                     | CψUAUUψGp                                  | M, 50U                             | 1180-1188                                                                                                | ψp                               | ND                                 | NA                                                                                                                                                                                                                            | >95                                                                                                  | N, RNase T1                                 | 1                                                   | 1204                                                                      | ψ                                                                     | 97                                                                                              | sirR36                                    |
| 18S  | 1191                            | 1-methyl-3-(3-amino-3-carboxypropyl)pseudouridine | ACm <sup>1</sup> acp <sup>3</sup> ψCAACACp | M                                  | 1189-1198                                                                                                | m1acp3ψp                         | ND                                 | NA                                                                                                                                                                                                                            | 100                                                                                                  | G, RNase T1                                 | 1                                                   | 1208                                                                      | m1acp3ψ                                                               | 100                                                                                             | sirR35, Nep1and Tar3                      |
| 18S  | 1289                            | 2'-O-methyl U                                     | UmGp                                       | M                                  | NA                                                                                                       | GGUmGGmUp                        | M                                  | 1287-1222                                                                                                                                                                                                                     | >95                                                                                                  | N, RNase H (Fragment H7)/RNase A            | 1                                                   | 1286                                                                      | Um                                                                    | 100                                                                                             | sirR55                                    |

|     |      |                                                   |                                                                 |           |                                                                                                                                                               |                                      |        |                                                                                                                                                                                                                                                                                                                                                                                                                                                         |     |                                      |    |      |                   |     |                      |
|-----|------|---------------------------------------------------|-----------------------------------------------------------------|-----------|---------------------------------------------------------------------------------------------------------------------------------------------------------------|--------------------------------------|--------|---------------------------------------------------------------------------------------------------------------------------------------------------------------------------------------------------------------------------------------------------------------------------------------------------------------------------------------------------------------------------------------------------------------------------------------------------------|-----|--------------------------------------|----|------|-------------------|-----|----------------------|
| 18S | 1271 | 2'-O-methyl G                                     | GmUGp                                                           | M         | 562-564, 902-904, 1048-1050, 1051-1053, 1265-1267, 1268-1270, 1271-1273, 1292-1294, 1352-1354, 1778-1780                                                      | GGUmGGmUp                            | M      | 1267-1272                                                                                                                                                                                                                                                                                                                                                                                                                                               | >95 | N, RNase H (Fragment H7)/RNase A     | 1  | 1288 | Gm                | 100 | snR40                |
| 18S | 1280 | N <sup>6</sup> -acetylcytidine                    | Cac <sup>6</sup> Cp                                             | M         | 573-574, 653-655, 1033-1035, 1279-1281, 1403-1405, 1458-1458, 1500-1502                                                                                       | ac <sup>6</sup> Cp                   | ND     | NA                                                                                                                                                                                                                                                                                                                                                                                                                                                      | 84  | G, RNase H (Fragment H7)/RNase T1    | 1  | 1297 | ac <sup>6</sup> C | 79  | Kre33                |
| 18S | 1290 | pseudouridine                                     | U <sup>ψ</sup> Gp                                               | M, 5dU    | 8-10, 808-810, 811-813, 832-834, 849-851, 835-837, 1289-1291, 1608-1610                                                                                       | ψp                                   | ND     | NA                                                                                                                                                                                                                                                                                                                                                                                                                                                      | 93  | G, RNase H (Fragment H7)/RNase T1    | 0  | 1307 | ψ                 | 91  | snR83                |
| 18S | 1415 | pseudouridine                                     | UU <sup>ψ</sup> Gp                                              | A, M, 5dU | 820-823, 1413-1416                                                                                                                                            | ψp                                   | ND     | NA                                                                                                                                                                                                                                                                                                                                                                                                                                                      | 79  | G, RNase T1                          | 0  | 1435 | ψ                 | 82  | snR83                |
| 18S | 1428 | 2'-O-methyl G                                     | CAAUAACAmGp                                                     | M         | 1420-1428                                                                                                                                                     | AGmGUp                               | M      | 1211-1214, 1427-1430, 1776-1779                                                                                                                                                                                                                                                                                                                                                                                                                         | >95 | G, RNase T1                          | 1  | 1448 | Gm                | 99  | snR56                |
| 18S | 1572 | 2'-O-methyl G                                     | CUCUUCACACmAGp                                                  | A, M      | 1563-1572                                                                                                                                                     | GmAGm <sup>6</sup> GAAUp             | M      | 1572-1578                                                                                                                                                                                                                                                                                                                                                                                                                                               | 100 | G, RNase T1                          | 1  | 1613 | Gm                | 100 | snR57                |
| 18S | 1575 | 7-methylguanosine                                 | m <sup>7</sup> GAAUUCUAGp                                       | M         | 1576-1584                                                                                                                                                     | GmAGm <sup>7</sup> GAAUp             | M      | 1572-1578                                                                                                                                                                                                                                                                                                                                                                                                                                               | >95 | G, RNase T1                          | 1  | 1616 | m <sup>7</sup> G  | 100 | Bud23-Trm112 complex |
| 18S | 1639 | 2'-O-methyl C                                     | CmCCp                                                           | M         | 644-647, 1639-1642                                                                                                                                            | G <sup>6</sup> CmCp                  | M      | 16-18, 307-309, 564-566, 948-950, 1032-1034, 1438-1440, 1622-1624, 1638-1640                                                                                                                                                                                                                                                                                                                                                                            | 79  | G, RNase T1                          | 1  | 1680 | Cm                | 97  | snR70                |
| 18S | 1773 | N <sup>6</sup> -acetylcytidine                    | UUUCac <sup>6</sup> Cp                                          | M         | 1769-1774                                                                                                                                                     | ac <sup>6</sup> Cp                   | ND     | NA                                                                                                                                                                                                                                                                                                                                                                                                                                                      | >95 | G, RNase T1                          | 1  | 1815 | ac <sup>6</sup> C | 97  | Kre33                |
| 18S | 1781 | N <sup>6</sup> ,N <sup>6</sup> -dimethyladenosine | m <sup>6</sup> ,Am <sup>6</sup> ACCUGp                          | M         | 1781-1786                                                                                                                                                     | Gm <sup>6</sup> ,Am <sup>6</sup> ACp | M      | 634-637, 732-735, 1324-1327, 1780-1783                                                                                                                                                                                                                                                                                                                                                                                                                  | 90  | G, RNase T1                          | 1  | 1823 | m <sup>6</sup> ,A | 94  | Dm1                  |
| 18S | 1782 | N <sup>6</sup> ,N <sup>6</sup> -dimethyladenosine | m <sup>6</sup> ,Am <sup>6</sup> ACCUGp                          | M         | 1781-1786                                                                                                                                                     | Gm <sup>6</sup> ,Am <sup>6</sup> ACp | M      | 634-637, 732-735, 1324-1327, 1780-1783                                                                                                                                                                                                                                                                                                                                                                                                                  | 90  | G, RNase T1                          | 1  | 1824 | m <sup>6</sup> ,A | 94  | Dm1                  |
| 18S | 1800 | 3'-end OH                                         | AUCAUA-OH                                                       | M         | 1794-1800                                                                                                                                                     | A-OH                                 | ND     | NA                                                                                                                                                                                                                                                                                                                                                                                                                                                      | ND  | G, RNase T1                          | ND | 1842 | 3'-end OH         | ND  | NA                   |
| 25S | 1    | 5'-end phosphate                                  | pUUGp                                                           | M         | 1-3                                                                                                                                                           | pUp                                  | ND     | NA                                                                                                                                                                                                                                                                                                                                                                                                                                                      | ND  | G, RNase T1                          | ND | 3    | 5'-end phosphate  | ND  | NA                   |
| 25S | 643  | 1-methyladenosine                                 | m <sup>1</sup> AAACAmCmGp                                       | M         | 643-649                                                                                                                                                       | Gm <sup>1</sup> AAAcP                | M      | 642-646, 2353-2357                                                                                                                                                                                                                                                                                                                                                                                                                                      | >95 | U, C, RNase H (Fragment H10)/RNase A | 1  | 670  | m <sup>1</sup> A  | 96  | Rp8                  |
| 25S | 647  | 2'-O-methyl A                                     | m <sup>2</sup> AAACAmCmGp                                       | M         | 643-649                                                                                                                                                       | AmCmGGAcP                            | M      | 647-652, 2111-2116                                                                                                                                                                                                                                                                                                                                                                                                                                      | >95 | N, RNase T1                          | 1  | 674  | Am                | 71  | U18                  |
| 25S | 648  | 2'-O-methyl C                                     | m <sup>2</sup> AAACAmCmGp                                       | M         | 643-649                                                                                                                                                       | AmCmGGAcP                            | M      | 647-652, 2111-2116                                                                                                                                                                                                                                                                                                                                                                                                                                      | 94  | U, C, RNase H (Fragment H10)/RNase A | 1  | 675  | no PTM            | 0   | U18                  |
| 25S | 661  | 2'-O-methyl C                                     | UCmUAACGp                                                       | A, M      | 660-666                                                                                                                                                       | CmUp                                 | M      | NA                                                                                                                                                                                                                                                                                                                                                                                                                                                      | 74  | G, RNase T1                          | 1  | 688  | Cm                | 74  | snR58                |
| 25S | 774  | pseudouridine                                     | AUUGp                                                           | A, M, 5dU | 773-777, 3389-3393                                                                                                                                            | GGAp                                 | M, 5dU | 767-770, 771-774, 1304-1307, 1616-1618, 1621-1624, 2313-2316, 2915-2918, 3042-3045, 3099-3102, 3174-3177                                                                                                                                                                                                                                                                                                                                                | 100 | G, RNase T1                          | 1  | 808  | no PTM            | 0   | snR80                |
| 25S | 803  | 2'-O-methyl G                                     | ACCCGmAmAGp                                                     | M         | 799-807                                                                                                                                                       | GmAmAGAUp                            | M      | 803-809                                                                                                                                                                                                                                                                                                                                                                                                                                                 | >95 | G, RNase T1                          | 1  | 837  | Gm                | 101 | snR39b               |
| 25S | 805  | 2'-O-methyl A                                     | ACCCGmAmAGp                                                     | M         | 799-807                                                                                                                                                       | GmAmAGAUp                            | M      | 803-809                                                                                                                                                                                                                                                                                                                                                                                                                                                 | >95 | N, RNase A                           | 1  | 839  | Am                | 100 | snR39 or snR59       |
| 25S | 815  | 2'-O-methyl A                                     | AmCUAUGp                                                        | M         | 814-820                                                                                                                                                       | GAACp                                | M      | 31-34, 345-348, 712-715, 813-816, 922-925, 1081-1084, 1150-1153, 1155-1158, 1287-1290, 1415-1418, 1861-1864, 3013-3016, 3110-3113, 3206-3209, 287-289, 342-344, 498-498, 535-537, 557-559, 670-678, 789-791, 864-866, 934-936, 965-967, 1223-1225, 1292-1294, 1447-1449, 1504-1506, 1697-1699, 1755-1757, 1845-1847, 1865-1867, 1976-1978, 2147-2149, 2273-2275, 2350-2352, 2361-2363, 2388-2390, 2552-2554, 2845-2847, 3213-3215, 3221-3223, 3345-3347 | 89  | G, RNase T1                          | 1  | 849  | Am                | 94  | snR60                |
| 25S | 865  | 2'-O-methyl G                                     | UAGmCCp                                                         | A, M      | 863-867                                                                                                                                                       | AGmCp                                | M      | 1225, 1292-1294, 1447-1449, 1504-1506, 1697-1699, 1755-1757, 1845-1847, 1865-1867, 1976-1978, 2147-2149, 2273-2275, 2350-2352, 2361-2363, 2388-2390, 2552-2554, 2845-2847, 3213-3215, 3221-3223, 3345-3347                                                                                                                                                                                                                                              | 78  | G, RNase H (Fragment H11)/RNase T1   | 1  | 899  | no PTM            | 0   | snR50                |
| 25S | 874  | 2'-O-methyl A                                     | AmCp                                                            | M         | 202-204, 598-598, 674-676, 1229-1231, 1361-1363, 1388-1390, 1513-1515, 1654-1656, 1785-1787, 1972-1974, 2047-2049, 2176-2178, 2301-2303                       | GAACp                                | M      | 3-6, 595-597, 748-750, 873-875, 1027-1029, 1033-1035, 1360-1362, 1387-1389, 1784-1786, 2128-2130, 2175-2177, 2259-2261, 2300-2302, 2416-2418, 2427-2429, 2848-2850, 3307-3309                                                                                                                                                                                                                                                                           | 75  | G, RNase H (Fragment H11)/RNase T1   | 1  | 908  | Am                | 68  | snR72                |
| 25S | 896  | 2'-O-methyl U                                     | AAUmUGp                                                         | A, M      | 893-896, 2777-2782                                                                                                                                            | UmUp                                 | M      | NA                                                                                                                                                                                                                                                                                                                                                                                                                                                      | 94  | G, RNase T1                          | 1  | 930  | Um                | 72  | snR40                |
| 25S | 906  | 2'-O-methyl G                                     | GmGp                                                            | M         | NA                                                                                                                                                            | AGmGGCp                              | M      | 904-909                                                                                                                                                                                                                                                                                                                                                                                                                                                 | 100 | U, C, RNase A                        | 1  | 940  | Gm                | 95  | snR60                |
| 25S | 958  | pseudouridine                                     | UUUCCVCAGp                                                      | A, M, 5dU | 952-961                                                                                                                                                       | ψp                                   | ND     | NA                                                                                                                                                                                                                                                                                                                                                                                                                                                      | 87  | G, RNase T1                          | 1  | 992  | ψ                 | 100 | snR8                 |
| 25S | 964  | pseudouridine                                     | A <sup>ψ</sup> AGp                                              | A, M, 5dU | 340-343, 963-966, 1877-1880                                                                                                                                   | AGGAp                                | M, 5dU | 514-518, 960-964                                                                                                                                                                                                                                                                                                                                                                                                                                        | 91  | G, RNase H (Fragment H11)/RNase T1   | 1  | 998  | ψ                 | 95  | snR43                |
| 25S | 984  | pseudouridine                                     | UUUUA <sup>ψ</sup> Gp                                           | A, M, 5dU | 983-989                                                                                                                                                       | ψp                                   | ND     | NA                                                                                                                                                                                                                                                                                                                                                                                                                                                      | 100 | N, RNase T1                          | 1  | 1018 | no PTM            | 0   | snR8                 |
| 25S | 988  | pseudouridine                                     | UUUUA <sup>ψ</sup> Gp                                           | A, M, 5dU | 983-989                                                                                                                                                       | A <sup>ψ</sup> p                     | M, 5dU | NA                                                                                                                                                                                                                                                                                                                                                                                                                                                      | 100 | N, RNase T1                          | 1  | 1022 | no PTM            | 0   | snR49                |
| 25S | 1002 | pseudouridine                                     | AA <sup>ψ</sup> Gp                                              | A, M, 5dU | 282-285, 530-533, 1000-1003, 1096-1099, 1284-1287, 1645-1648, 2205-2208, 2310-2313, 2992-2995                                                                 | GAAP                                 | M, 5dU | 824-827, 892-895, 999-1002, 1095-1098, 1283-1286, 1644-1647, 2204-2207, 2309-2312, 2730-2733, 2991-2994, 3160-3163, 3264-3267                                                                                                                                                                                                                                                                                                                           | 85  | G, RNase H (Fragment H11)/RNase T1   | 1  | 1036 | ψ                 | 106 | snR5                 |
| 25S | 1040 | pseudouridine                                     | ACCUAU <sup>ψ</sup> CUCAACUU <sup>ψ</sup> AAA <sup>ψ</sup> AUGp | M, 5dU    | 1034-1057                                                                                                                                                     | ψp                                   | ND     | NA                                                                                                                                                                                                                                                                                                                                                                                                                                                      | >95 | N, RNase T1                          | 1  | 1074 | ψ                 | 100 | snR33                |
| 25S | 1050 | pseudouridine                                     | ACCUAU <sup>ψ</sup> CUCAACUU <sup>ψ</sup> AAA <sup>ψ</sup> AUGp | M, 5dU    | 1034-1057                                                                                                                                                     | ψp                                   | ND     | NA                                                                                                                                                                                                                                                                                                                                                                                                                                                      | >95 | N, RNase T1                          | 1  | 1083 | ψ                 | 92  | snR81                |
| 25S | 1054 | pseudouridine                                     | ACCUAU <sup>ψ</sup> CUCAACUU <sup>ψ</sup> AAA <sup>ψ</sup> AUGp | M, 5dU    | 1034-1057                                                                                                                                                     | AA <sup>ψ</sup> p                    | M, 5dU | 9-12, 112-115, 304-307, 321-324, 519-522, 880-883, 1051-1054, 1450-1453, 1458-1461, 2277-2280, 3292-3295                                                                                                                                                                                                                                                                                                                                                | >95 | N, RNase T1                          | 1  | 1088 | no PTM            | 0   | snR44                |
| 25S | 1108 | pseudouridine                                     | CUU <sup>ψ</sup> UAGp                                           | A, M, 5dU | 1105-1111                                                                                                                                                     | ψp                                   | ND     | NA                                                                                                                                                                                                                                                                                                                                                                                                                                                      | 70  | G, RNase T1                          | 1  | 1141 | no PTM            | 0   | snR82                |
| 25S | 1122 | pseudouridine                                     | CCAUU <sup>ψ</sup> UAGp                                         | A, M, 5dU | 1118-1124                                                                                                                                                     | ψp                                   | ND     | NA                                                                                                                                                                                                                                                                                                                                                                                                                                                      | >95 | G, RNase T1                          | 1  | 1155 | ψ                 | 100 | snR5                 |
| 25S | 1131 | 2'-O-methyl A                                     | CAmGp                                                           | M         | 286-288, 513-515, 967-969, 1130-1132, 1370-1372, 1430-1432, 1506-1508, 1572-1574, 1844-1846, 1847-1849, 1975-1977, 2381-2383, 2844-2846, 2830-2832, 2897-2899 | AmGAACp                              | M      | 1131-1135, 2102-2106, 2687-2691, 3137-3141                                                                                                                                                                                                                                                                                                                                                                                                              | 88  | U, C, RNase A                        | 1  | 1164 | Am                | 93  | snR61                |

|     |      |                               |                               |           |                                                                                                                                                                  |                      |        |                                                                                                                                                                                                                                                                                                                              |            |                                     |   |      |                  |     |                |
|-----|------|-------------------------------|-------------------------------|-----------|------------------------------------------------------------------------------------------------------------------------------------------------------------------|----------------------|--------|------------------------------------------------------------------------------------------------------------------------------------------------------------------------------------------------------------------------------------------------------------------------------------------------------------------------------|------------|-------------------------------------|---|------|------------------|-----|----------------|
| 25S | 1435 | 2'-O-methyl C                 | AUCmUUGp                      | A, M      | 1433-1438                                                                                                                                                        | CmUp                 | M      | NA                                                                                                                                                                                                                                                                                                                           | >95        | G, RNase T1                         | 1 | 1471 | Cm               | 92  | U24            |
| 25S | 1447 | 2'-O-methyl A                 | UAmGmCAAUAUCAAUGp             | M         | 1446-1462                                                                                                                                                        | AmGmCp               | M      | 287-289, 342-344, 496-498, 535-537, 557-559, 578-578, 789-791, 864-866, 934-936, 955-967, 1223-1225, 1292-1294, 1447-1449, 1504-1506, 1697-1699, 1755-1757, 1845-1847, 1865-1867, 1976-1978, 2147-2149, 2273-2275, 2350-2352, 2361-2363, 2388-2390, 2552-2554, 2845-2847, 3213-3215, 3221-3223, 3345-3347                    | >95        | N, RNase H (Fragment H13)/RNase T1  | 1 | 1483 | Am               | 100 | U24            |
| 25S | 1448 | 2'-O-methyl G                 | UAmGmCAAUAUCAAUGp             | M         | 1446-1462                                                                                                                                                        | AmGmCp               | M      | 287-289, 342-344, 496-498, 535-537, 557-559, 578-578, 789-791, 864-866, 934-936, 955-967, 1223-1225, 1292-1294, 1447-1449, 1504-1506, 1697-1699, 1755-1757, 1845-1847, 1865-1867, 1976-1978, 2147-2149, 2273-2275, 2350-2352, 2361-2363, 2388-2390, 2552-2554, 2845-2847, 3213-3215, 3221-3223, 3345-3347                    | >95        | G, RNase T1                         | 1 | 1484 | Gm               | 99  | U24            |
| 25S | 1886 | 2'-O-methyl U                 | AAUAUmGp                      | A, M      | 1881-1887                                                                                                                                                        | AAUmGUp              | M      | 1884-1888, 2180-2184, 3271-3275                                                                                                                                                                                                                                                                                              | >95        | G, RNase T1                         | 1 | 1943 | Um               | 97  | snR82          |
| 25S | 2127 | pseudouridine                 | AAUCWp                        | A, M, 50U | 2123-2128                                                                                                                                                        | Wp                   | ND     | NA                                                                                                                                                                                                                                                                                                                           | 91         | G, RNase H (Fragment H15)/RNase T1  | 1 | 2217 | W                | 98  | snR3           |
| 25S | 2131 | pseudouridine                 | ACWp                          | A, M, 50U | 583-586, 590-593, 1475-1478, 1993-1996, 2129-2132                                                                                                                | Wp                   | ND     | NA                                                                                                                                                                                                                                                                                                                           | 100        | G, RNase H (Fragment H15)/RNase T1  | 1 | 2221 | W                | 103 | snR3           |
| 25S | 2140 | 1-methyladenosine             | UCUAAUm <sup>1</sup> AAACAUGp | A, M      | 2133-2148                                                                                                                                                        | m <sup>1</sup> AAACp | M      | 688-692, 2140-2144                                                                                                                                                                                                                                                                                                           | >95        | G, RNase T1                         | 1 | 2230 | m <sup>1</sup> A | 100 | Bmi2           |
| 25S | 2189 | pseudouridine                 | AUUVp                         | M, 50U    | 2186-2192                                                                                                                                                        | Vp                   | ND     | NA                                                                                                                                                                                                                                                                                                                           | >95        | G, RNase T1                         | 1 | 2279 | V                | 97  | snR32          |
| 25S | 2195 | 2'-O-methyl C                 | CCmAGp                        | A, M      | 2193-2197                                                                                                                                                        | CmAGUp               | M      | 501-504, 980-983, 1383-1386, 2195-2198, 2477-2480, 2683-2686, 2724-2727                                                                                                                                                                                                                                                      | 91         | G, RNase T1                         | 1 | 2285 | no PTM           | 0   | snR76          |
| 25S | 2218 | 2'-O-methyl A                 | AAmGp                         | M         | 97-99, 283-285, 420-422, 834-836, 949-951, 970-972, 1062-1064, 1100-1102, 1242-1244, 1391-1393, 1472-1474, 1479-1481, 1543-1545, 1747-1746, 1807-1809, 1898-1900 | GAAmGAAUp            | M      | 2218-2223                                                                                                                                                                                                                                                                                                                    | 93         | UIC, RNase A                        | 0 | 2308 | Am               | 66  | snR47          |
| 25S | 2254 | 2'-O-methyl A                 | UAAmCWAUGp                    | A, M, 50U | 2252-2259                                                                                                                                                        | AAmCp                | M      | 68-70, 86-88, 162-164, 683-685, 1208-1210, 1271-1273, 1501-1503, 1635-1637, 1640-1642, 1694-1696, 1839-1841, 1919-1921, 2090-2092, 2097-2099, 2226-2228, 2253-2255, 2318-2320, 2640-2642, 2817-2819, 3224-3226, 3320-3322                                                                                                    | 100        | N, RNase T1                         | 1 | 2344 | Am               | 69  | snR63          |
| 25S | 2256 | pseudouridine                 | UAAmCWAUGp                    | A, M, 50U | 2252-2259                                                                                                                                                        | Wp                   | ND     | NA                                                                                                                                                                                                                                                                                                                           | >95        | N, RNase T1                         | 1 | 2346 | W                | 100 | snR191         |
| 25S | 2258 | pseudouridine                 | UAAmCWAUGp                    | A, M, 50U | 2252-2259                                                                                                                                                        | AVp                  | M, 50U | NA                                                                                                                                                                                                                                                                                                                           | >95        | N, RNase T1                         | 1 | 2348 | no PTM           | 0   | snR191         |
| 25S | 2262 | pseudouridine                 | ACWp                          | M, 50U    | 2260-2270                                                                                                                                                        | Wp                   | ND     | NA                                                                                                                                                                                                                                                                                                                           | >95        | N, RNase T1                         | 1 | 2352 | W                | 100 | snR3           |
| 25S | 2264 | pseudouridine                 | ACWp                          | M, 50U    | 2260-2270                                                                                                                                                        | Wp                   | ND     | NA                                                                                                                                                                                                                                                                                                                           | >95        | N, RNase T1                         | 1 | 2354 | W                | 100 | snR84          |
| 25S | 2276 | 5-methylcytidine              | Cm <sup>5</sup> CAmAmUg       | M         | 2275-2281                                                                                                                                                        | m <sup>5</sup> Cp    | ND     | NA                                                                                                                                                                                                                                                                                                                           | 100        | N, RNase T1                         | 1 | 2366 | m <sup>5</sup> C | 100 | Rcm1           |
| 25S | 2278 | 2'-O-methyl A                 | Cm <sup>5</sup> CAmAmUg       | M         | 2275-2281                                                                                                                                                        | AAmUp                | M      | 9-12, 112-115, 304-307, 321-324, 519-522, 880-883, 1051-1054, 1450-1453, 1458-1461, 2277-2280, 3292-3295                                                                                                                                                                                                                     | 100        | N, RNase T1                         | 1 | 2368 | no PTM           | 0   | snR13          |
| 25S | 2279 | 2'-O-methyl A                 | Cm <sup>5</sup> CAmAmUg       | M         | 2275-2281                                                                                                                                                        | AAmUp                | M      | 9-12, 112-115, 304-307, 321-324, 519-522, 880-883, 1051-1054, 1450-1453, 1458-1461, 2277-2280, 3292-3295                                                                                                                                                                                                                     | 100        | N, RNase T1                         | 1 | 2369 | Am               | 74  | snR13          |
| 25S | 2286 | 2'-O-methyl G                 | CCUCGmUCAUUAUUGp              | M         | 2282-2288                                                                                                                                                        | GmUp                 | M      | NA                                                                                                                                                                                                                                                                                                                           | >95        | G, RNase T1                         | 1 | 2378 | Gm               | 99  | snR75          |
| 25S | 2312 | pseudouridine                 | AAWp                          | A, M, 50U | 282-285, 530-533, 1000-1003, 1096-1099, 1284-1287, 1645-1648, 2205-2208, 2310-2313, 2992-2995                                                                    | GAWp                 | M, 50U | 624-627, 892-895, 999-1002, 1095-1098, 1283-1286, 1644-1647, 2004-2007, 2309-2312, 2730-2733, 2997-2994, 3180-3183, 3284-3287                                                                                                                                                                                                | 100        | G, RNase H (Fragment H17)/RNase T1  | 1 | 2402 | W                | 98  | snR86          |
| 25S | 2335 | 2'-O-methyl C                 | UcmCCWAUCACWmAWCp             | M, 50U    | 2334-2351                                                                                                                                                        | CmCp                 | M      | NA                                                                                                                                                                                                                                                                                                                           | 100        | N, RNase T1                         | 1 | 2425 | Cm               | 91  | snR84          |
| 25S | 2338 | pseudouridine                 | UcmCCWAUCACWmAWCp             | M, 50U    | 2334-2351                                                                                                                                                        | Wp                   | ND     | NA                                                                                                                                                                                                                                                                                                                           | 100        | N, RNase T1                         | 1 | 2428 | no PTM           | 0   | snR9           |
| 25S | 2345 | 2'-O-methylated pseudouridine | UcmCCWAUCACWmAWCp             | M, 50U    | 2334-2351                                                                                                                                                        | WmAWp                | M, 50U | 184-186, 554-556, 625-627, 689-671, 817-819, 986-988, 1037-1039, 1327-1329, 1586-1570, 1680-1682, 1701-1703, 1720-1722, 1738-1740, 2256-2258, 2338-2340, 2345-2347, 2497-2499, 2512-2514, 2755-2757, 2884-2886, 3103-3105                                                                                                    | in Table 2 | N, RNase T1                         | 1 | 2435 | W                | 62  | snRF and snR65 |
| 25S | 2347 | pseudouridine                 | UcmCCWAUCACWmAWCp             | M, 50U    | 2334-2351                                                                                                                                                        | UmAWp                | M, 50U | 184-186, 554-556, 625-627, 689-671, 817-819, 986-988, 1037-1039, 1327-1329, 1586-1570, 1680-1682, 1701-1703, 1720-1722, 1738-1740, 2256-2258, 2338-2340, 2345-2347, 2497-2499, 2512-2514, 2755-2757, 2884-2886, 3103-3105                                                                                                    | 100        | N, RNase T1                         | 1 | 2437 | W                | 100 | snR82          |
| 25S | 2349 | pseudouridine                 | UcmCCWAUCACWmAWCp             | M, 50U    | 2334-2351                                                                                                                                                        | Wp                   | ND     | NA                                                                                                                                                                                                                                                                                                                           | 100        | N, RNase T1                         | 1 | 2439 | W                | 100 | snR82          |
| 25S | 2414 | pseudouridine                 | CUUmGp                        | A, M, 50U | 537-540, 1779-1782, 1986-1989, 1997-2000, 2007-2010, 2078-2081, 2376-2379, 2413-2416, 2823-2826, 3255-3258                                                       | Wp                   | ND     | NA                                                                                                                                                                                                                                                                                                                           | >95        | N, RNase H (Fragment H17)/RNase T1  | 1 | 2504 | W                | 100 | snR11          |
| 25S | 2415 | 2'-O-methyl U                 | CUUmGp                        | A, M, 50U | 537-540, 1779-1782, 1986-1989, 1997-2000, 2007-2010, 2078-2081, 2376-2379, 2413-2416, 2823-2826, 3255-3258                                                       | UmGACp               | M      | 2-4, 872-875, 1032-1035, 1359-1362, 2127-2130, 2174-2177, 2415-2418, 2428-2429                                                                                                                                                                                                                                               | 100        | UIC, RNase H (Fragment H17)/RNase A | 1 | 2505 | Um               | 69  | snR66          |
| 25S | 2419 | 2'-O-methyl U                 | ACUmCUAGp                     | A, M      | 2417-2423                                                                                                                                                        | UmCp                 | M      | NA                                                                                                                                                                                                                                                                                                                           | >95        | G, RNase T1                         | 1 | 2509 | Um               | 100 | snR78          |
| 25S | 2617 | 2'-O-methyl G                 | GmGp                          | M         | NA                                                                                                                                                               | GmGGCp               | M      | 168-172, 723-727, 2003-2007, 2571-2575, 2616-2620                                                                                                                                                                                                                                                                            | 87         | UIC, RNase H (Fragment H18)/RNase A | 1 | 2714 | Gm               | 97  | snR67          |
| 25S | 2632 | 3-methyluridine               | Um <sup>3</sup> UAACp         | A, M      | 2631-2637                                                                                                                                                        | m <sup>3</sup> UAACp | M      | 2632-2636                                                                                                                                                                                                                                                                                                                    | >95        | G, RNase T1                         | 1 | 2729 | m <sup>3</sup> U | 99  | Bmi5           |
| 25S | 2638 | 2'-O-methyl A                 | AAmUACp                       | A, M      | 2638-2643                                                                                                                                                        | GAUmUp               | M      | 339-341, 358-360, 430-432, 752-754, 759-760, 885-887, 1003-1005, 1140-1142, 1347-1349, 1352-1354, 1528-1528, 1563-1565, 1836-1838, 1876-1878, 2093-2095, 2155-2157, 2166-2171, 2185-2187, 2377-2379, 2637-2639, 2712-2714, 2716-2720, 2759-2761, 2861-2863, 2989-2871, 2986-2990, 3007-3009, 3147-3149, 3399-3361, 3388-3390 | 93         | G, RNase T1                         | 1 | 2735 | Am               | 80  | snR68          |
| 25S | 2722 | 2'-O-methyl U                 | AUUmUCAGp                     | A, M      | 2719-2726                                                                                                                                                        | UmUp                 | M      | NA                                                                                                                                                                                                                                                                                                                           | >95        | G, RNase T1                         | 1 | 2819 | no PTM           | 0   | snR67          |
| 25S | 2727 | 2'-O-methyl U                 | UmGp                          | M         | NA                                                                                                                                                               | AGUmGUp              | M      | 2725-2729                                                                                                                                                                                                                                                                                                                    | 75         | UIC, RNase H (Fragment H18)/RNase A | 1 | 2824 | Um               | 72  | snR51          |

|     |      |                  |                                           |           |                                                                                                                                                                    |                           |        |                                                                                                                                                                                                                                                                                                                                              |     |                                    |    |      |                  |     |        |
|-----|------|------------------|-------------------------------------------|-----------|--------------------------------------------------------------------------------------------------------------------------------------------------------------------|---------------------------|--------|----------------------------------------------------------------------------------------------------------------------------------------------------------------------------------------------------------------------------------------------------------------------------------------------------------------------------------------------|-----|------------------------------------|----|------|------------------|-----|--------|
| 25S | 2733 | pseudouridine    | <b>AAVACAACCAUGp</b>                      | A, M, 5dU | <u>2731-2743</u>                                                                                                                                                   | <b>GAAPp</b>              | M, 5dU | 824-827, 892-895, 999-1002, 1095-1098, 1283-1286, 1844-1847, 2204-2207, 2309-2312, 2730-2733, 2991-2994, 3180-3183, 3284-3287                                                                                                                                                                                                                | 85  | G, RNase T1                        | 1  | 2830 | no PTM           | 0   | snR189 |
| 25S | 2789 | 2'-O-methyl G    | <b>CUAGmAGmGp</b>                         | M         | <u>2788-2792</u>                                                                                                                                                   | <b>AGmAGmGUp</b>          | M      | 1007-1012, 2788-2793                                                                                                                                                                                                                                                                                                                         | 86  | G, RNase H (Fragment H19)/RNase T1 | 1  | 2886 | Gm               | 99  | snR48  |
| 25S | 2791 | 2'-O-methyl G    | <b>CUAGmAGmGp</b>                         | M         | <u>2788-2792</u>                                                                                                                                                   | <b>AGmAGmGUp</b>          | M      | 1007-1012, 2788-2793                                                                                                                                                                                                                                                                                                                         | >95 | N, RNase H (Fragment H19)/RNase A  | 1  | 2888 | Gm               | 94  | snR48  |
| 25S | 2813 | 2'-O-methyl G    | <b>GmGp</b>                               | M         | NA                                                                                                                                                                 | <b>AGmAGmGUp</b>          | M      | <u>2811-2816</u>                                                                                                                                                                                                                                                                                                                             | >95 | U/C, RNase A                       | 1  | 2910 | Gm               | 85  | snR38  |
| 25S | 2824 | pseudouridine    | <b>CVPUp</b>                              | A, M, 5dU | 537-540, 1779-1782, 1986-1989, 1997-2000, 2007-2010, 2076-2081, 2376-2379, 2413-2416, 2823-2826, 3255-3258                                                         | <b>Vp</b>                 | ND     | NA                                                                                                                                                                                                                                                                                                                                           | 87  | G, RNase H (Fragment H19)/RNase T1 | 1  | 2921 | ψ                | 99  | snR34  |
| 25S | 2841 | 3-methyluridine  | <b>Um<sup>3</sup>UCAUAGp</b>              | A, M      | <u>2840-2846</u>                                                                                                                                                   | <b>m<sup>3</sup>UCp</b>   | M      | NA                                                                                                                                                                                                                                                                                                                                           | >95 | G, RNase T1                        | 0  | 2938 | no PTM           | 0   | Bm6    |
| 25S | 2863 | pseudouridine    | <b>AVUCUUm<sup>3</sup>Cp</b>              | A, M      | <u>2862-2869</u>                                                                                                                                                   | <b>GA<sup>3</sup>Pp</b>   | M, 5dU | 339-341, 358-360, 430-432, 752-754, 759-760, 885-887, 1003-1005, 1140-1142, 1347-1349, 1352-1354, 1526-1528, 1563-1565, 1836-1838, 1876-1878, 2093-2095, 2155-2157, 2168-2171, 2185-2187, 2377-2379, 2637-2639, 2712-2714, 2718-2720, 2759-2761, 2861-2863, 2869-2871, 2988-2990, 3087-3089, 3147-3149, 3359-3361, 3388-3390                 | >95 | N, RNase T1                        | 1  | 2960 | ψ                | 86  | snR46  |
| 25S | 2868 | 5-methylcytidine | <b>AVUCUUm<sup>5</sup>Cp</b>              | A, M      | <u>2862-2869</u>                                                                                                                                                   | <b>m<sup>5</sup>Cp</b>    | ND     | NA                                                                                                                                                                                                                                                                                                                                           | >95 | N, RNase T1                        | 1  | 2965 | m <sup>5</sup> C | 100 | Nop2   |
| 25S | 2878 | pseudouridine    | <b>CVCUCCUACAUAACCGp</b>                  | M, 5dU    | <u>2877-2893</u>                                                                                                                                                   | <b>Vp</b>                 | ND     | NA                                                                                                                                                                                                                                                                                                                                           | 100 | G, RNase T1                        | 1  | 2975 | ψ                | 91  | snR34  |
| 25S | 2919 | 2'-O-methyl U    | <b>AUUmGm<sup>3</sup>UCACCCACUAUAUAGp</b> | M, 5dU    | <u>2917-2935</u>                                                                                                                                                   | <b>UmGm<sup>3</sup>Pp</b> | M, 5dU | 145-147, 180-182, 248-250, 274-276, 409-411, 447-449, 463-465, 561-563, 792-794, 1069-1071, 1781-1783, 1988-1990, 2039-2041, 2042-2044, 2066-2068, 2131-2133, 2332-2334, 2406-2408, 2432-2434, 2595-2597, 2629-2631, 2825-2827, 2919-2921, 3062-3064, 3194-3196, 2919-2921, 3062-3064, 3194-3196, 3300-3302, 3330-3332, 3350-3352, 3383-3385 | >95 | N, RNase H (Fragment H19)/RNase T1 | 1  | 3016 | Um               | 100 | snR52  |
| 25S | 2920 | 2'-O-methyl G    | <b>AUUmGm<sup>3</sup>UCACCCACUAUAUAGp</b> | M, 5dU    | <u>2917-2935</u>                                                                                                                                                   | <b>UmGm<sup>3</sup>Pp</b> | M, 5dU | 145-147, 180-182, 248-250, 274-276, 409-411, 447-449, 463-465, 561-563, 792-794, 1069-1071, 1781-1783, 1988-1990, 2039-2041, 2042-2044, 2066-2068, 2131-2133, 2332-2334, 2406-2408, 2432-2434, 2595-2597, 2629-2631, 2825-2827, 2919-2921, 3062-3064, 3194-3196, 3300-3302, 3330-3332, 3350-3352, 3383-3385                                  | >95 | N, RNase H (Fragment H19)/RNase T1 | 1  | 3017 | Gm               | 100 | SPB1   |
| 25S | 2921 | pseudouridine    | <b>AUUmGm<sup>3</sup>UCACCCACUAUAUAGp</b> | M, 5dU    | <u>2917-2935</u>                                                                                                                                                   | <b>UmGm<sup>3</sup>Pp</b> | M, 5dU | 145-147, 180-182, 248-250, 274-276, 409-411, 447-449, 463-465, 561-563, 792-794, 1069-1071, 1781-1783, 1988-1990, 2039-2041, 2042-2044, 2066-2068, 2131-2133, 2332-2334, 2406-2408, 2432-2434, 2595-2597, 2629-2631, 2825-2827, 2919-2921, 3062-3064, 3194-3196, 3300-3302, 3330-3332, 3350-3352, 3383-3385                                  | >95 | N, RNase H (Fragment H19)/RNase T1 | 1  | 3018 | ψ                | 100 | snR10  |
| 25S | 2942 | pseudouridine    | <b>Vp</b>                                 | M, 5dU    | NA                                                                                                                                                                 | <b>GVPp</b>               | M, 5dU | NA                                                                                                                                                                                                                                                                                                                                           | 58  | G, RNase H (Fragment H19)/RNase T1 | 1  | 3039 | ψ                | 98  | snR37  |
| 25S | 2944 | 2'-O-methyl A    | <b>AmGp</b>                               | M         | NA                                                                                                                                                                 | <b>GAmGmUp</b>            | M      | 2410-2414, 2943-2947                                                                                                                                                                                                                                                                                                                         | 91  | G, RNase H (Fragment H19)/RNase T1 | 1  | 3041 | Am               | 99  | snR71  |
| 25S | 2946 | 2'-O-methyl C    | <b>CmUGp</b>                              | M         | 29-31, 578-580, 612-614, 781-793, 938-938, 1743-1745, 1765-1767, 2529-2531, 2575-2577, 2814-2816, 2946-2948, 3081-3083, 3091-3092, 3108-3110, 3204-3206, 3259-3261 | <b>GAmGmUp</b>            | M      | 2410-2414, 2943-2947                                                                                                                                                                                                                                                                                                                         | >95 | G, RNase H (Fragment H19)/RNase T1 | 1  | 3043 | Cm               | 82  | snR69  |
| 25S | 2957 | 2'-O-methyl C    | <b>ACmCp</b>                              | A, M      | 336-338, 749-752, 1369-1402, 2071-2074, 2956-2959                                                                                                                  | <b>AGACmCp</b>            | M      | 1397-1401, 2069-2073, 2954-2958                                                                                                                                                                                                                                                                                                              | 94  | G, RNase H (Fragment H19)/RNase T1 | 1  | 3054 | Cm               | 80  | snR73  |
| 25S | 2973 | pseudouridine    | <b>UVAGp</b>                              | M, 5dU    | 1208-1211, 1520-1523, 2972-2975                                                                                                                                    | <b>Vp</b>                 | ND     | NA                                                                                                                                                                                                                                                                                                                                           | >95 | G, RNase H (Fragment H19)/RNase T1 | 1  | 3070 | ψ                | 99  | snR42  |
| 25S | 3394 | 3'-end OH        | <b>U-OH</b>                               | ND        | NA                                                                                                                                                                 | <b>GU-OH</b>              | M      | <u>3393-3394</u>                                                                                                                                                                                                                                                                                                                             | ND  | U/C, RNase A                       | ND | 3498 | 3'-end OH        | ND  | NA     |

a. Modified residues are in red.

b. The RNA fragment was identified by Aridne (A) and/or by manual inspection of MS and MS/MS spectra (M). 5dU, rRNA labeled with 5-D-uracil was used to determine the position of pseudouridines; ND, not detected.

c. Candidates consisting of three or more bases are indicated. The final determined position is underlined. NA, not assigned.

d. Fragment number obtained by RNase H digestion is defined in Supplementary Table 1 and Supplementary Figure S1. G, internal standard labeled by <sup>13</sup>C<sub>3</sub>JCTP was used for stoichiometric quantification; U/C, internal standard labeled by <sup>13</sup>C<sub>3</sub>JCTP and <sup>13</sup>C<sub>3</sub>JCTP was used for stoichiometric quantification; N, stoichiometry was determined from the ratio of LC-MS peak areas of the RNA fragments possessing the same RNA backbone (total area of fragments with the modification/that of all fragments) with no isotopic label. ND, not determined.

e. According to Tacka M et al. Nucleic Acids Res. 2015 Oct 15;43(18):e115. NA, not assigned.

f. According to the supplementary table in Sharma S and Lafontaine DL. Trends Biochem Sci. 2015 Oct;40(10):560-75 except for snR8 of U2345 of 25S rRNA. NA, not assigned.

g. Identified in this study.



Supplementary Table S3. Stoichiometries of U and modified nucleoties at positions 2338 and U2345 in *S. cerevisiae* 25S rRNA.

| Plasmid <sup>a</sup> | U2338            |                  | U2345            |                   |                  |                   |
|----------------------|------------------|------------------|------------------|-------------------|------------------|-------------------|
|                      | U % <sup>b</sup> | Ψ % <sup>b</sup> | U % <sup>b</sup> | Um % <sup>b</sup> | Ψ % <sup>b</sup> | Ψm % <sup>b</sup> |
| pSEC                 | 100.0            | 0.0              | 14.8             | 85.2              | 0.0              | 0.0               |
| pSECR9WT             | 0.0              | 100.0            | 12.8             | 74.5              | 5.5              | 7.2               |
| pSECR9A33G           | 61.0             | 39.0             | 24.6             | 75.4              | 0.0              | 0.0               |
| pSECR9G67A           | 64.2             | 35.8             | 20.0             | 80.0              | 0.0              | 0.0               |
| pSECR9G69A           | 40.9             | 59.1             | 13.1             | 86.9              | 0.0              | 0.0               |

a. Each plasmid was transformed into ΔsnR9\_2 that was then cultured in the U/C-5-D-labelling medium containing 0.01% (w/v) 5-D-uracil.

b. The values were calculated from the peak areas obtained by extracted ion monitoring of the most abundant masses of RNase T1 fragments containing U2338 and U2345 of 25S rRNA. The rRNAs used in this experiment were purified by reversed-phase LC of total
